# Supplementary material for: Diacetyl Vapor Inhalation Induces Mixed, Granulocytic Lung Inflammation with Increased CD4+CD25+ T Cells in the Rat
Source: MDPI journal article supplement (doi:10.3390/toxics9120359), 2021-12-20
Supplement: s1 [file s1]

# Supplementary Materials: Diacetyl Vapor Inhalation Induces Mixed, Granulocytic Lung Inflammation with Increased CD4<sup>+</sup>CD25<sup>+</sup> T Cells in the Rat

Emma L. House, So-Young Kim, Carl J. Johnston, Angela M. Groves, Eric Hernady, Ravi S. Misra, and Matthew D. McGraw

Table S1. Flow Cytometry Antibody Panel

| Scheme 1. Flow Cytometry Markers. | Catalog #  | Source     | Fluorochrome  | Dilution |
|-----------------------------------|------------|------------|---------------|----------|
| CD3                               | 201414     | Biolegend  | APC           | 1:150    |
| CD8                               | 25-0084-82 | Invitrogen | PE-Cyanine 7  | 1:150    |
| CD4                               | 201518     | Biolegend  | APC-Cyanine 7 | 1:100    |
| CD25                              | 202103     | Biolegend  | Fitc          | 1:100    |
| FoxP3                             | IC8970P    | R&D        | PE            | 1:100    |
| UltraComp Beads                   | 01-2222-42 | Invitrogen |               |          |

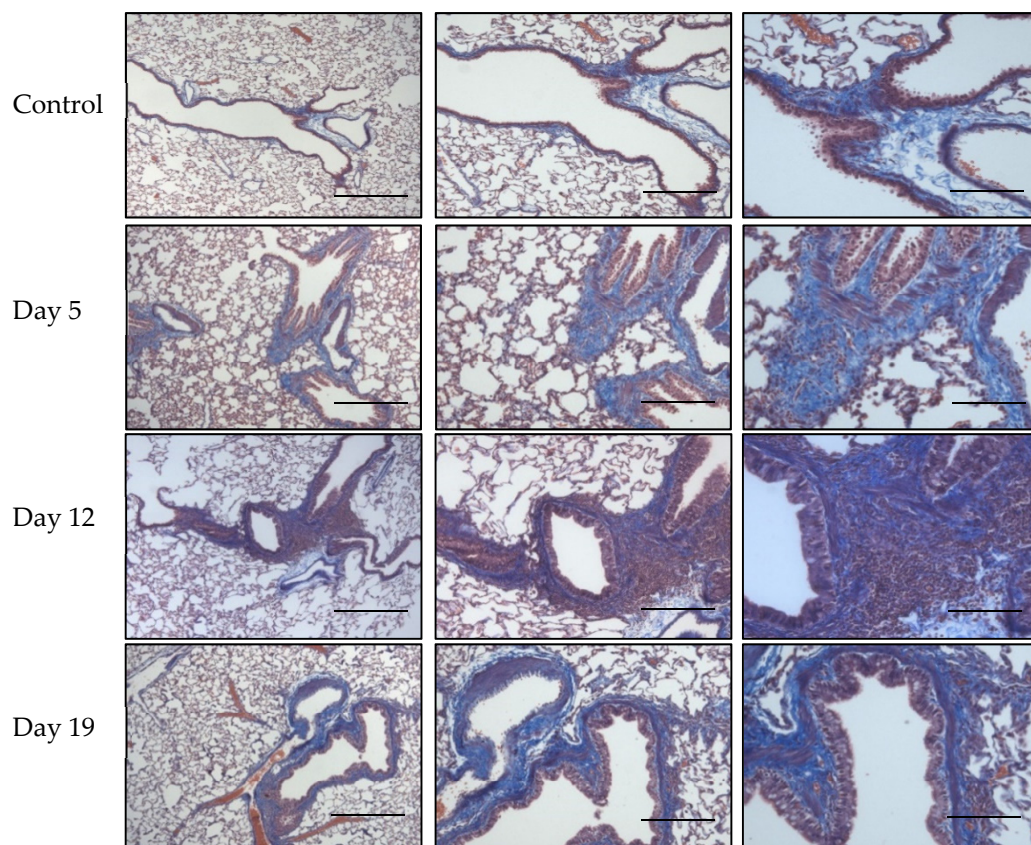

**Figure S1.** Representative rat lung sections stained for Masson's Trichrome demonstrating collagen I deposition (blue) (bar: 250  $\mu$ m (left column), 75  $\mu$ m (middle column), and 50  $\mu$ m (right column)). (a) Room air (Control)-exposed rat airways, (b) DA Day 5 (immediately post-exposure) rat airways (c) DA Day 12 (1 week following DA exposures) rat airways, and (d) Day 19 (2 weeks post-exposure) rat airways. Organization of collagen I is noted in DA-exposed rats as early as Day 5 and persists to Day 19.

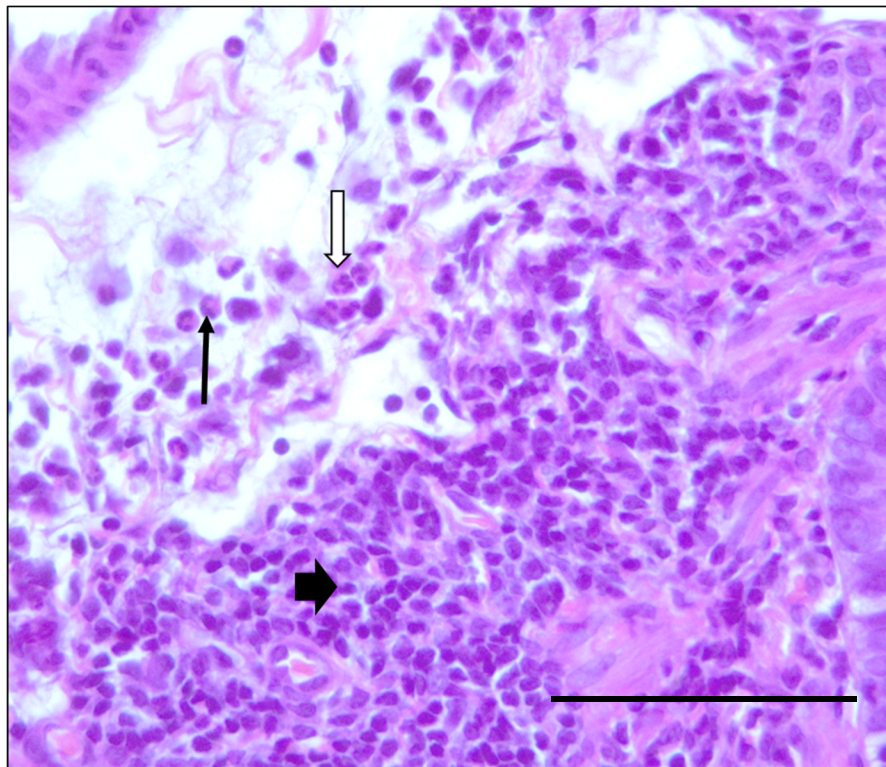

**Figure S2.** Higher magnification image of hematoxylin & eosin (H&E) stained rat lung section at Day 12 post-diacetyl exposure. Mixed inflammatory infiltrate adjacent to DA affected airway with neutrophils (white arrow), eosinophils (black arrow), and clustered lymphocytes (arrow head) (bar: 25  $\mu$ m).

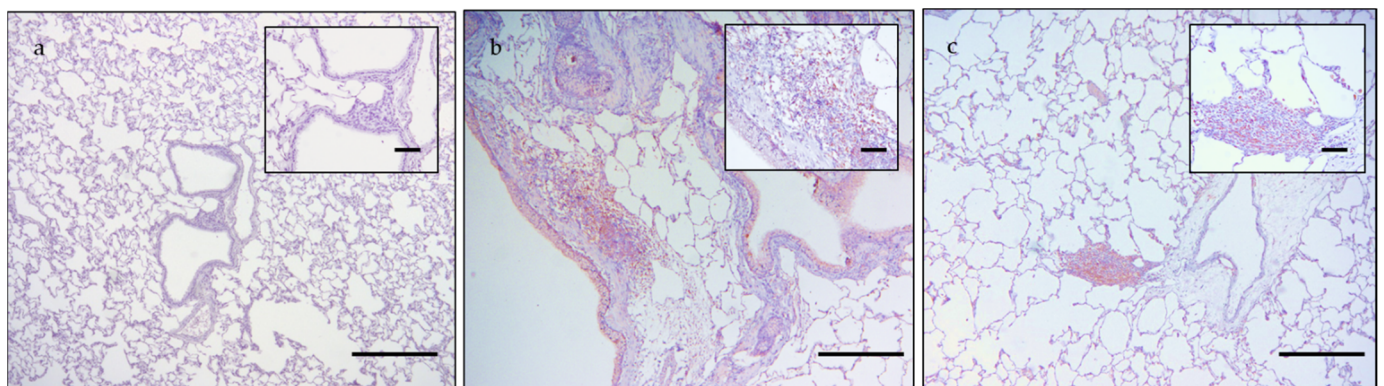

**Figure S3.** Rat lung sections stained for CD3, a T cell marker, and counterstained for hematoxylin in room air controls (a), DA-exposed Day 12 (b), and DA-exposed Day 19 (c) (bar: 250  $\mu$ m). Inserts highlight the airway-centric, lymphoid aggregates with prominent CD3+ T cell staining within lymphoid aggregates (bar: 25  $\mu$ m).
